# Supplementary material
Source: MDPI journal article supplement (https://www.mdpi.com/2071-1050/15/18/14022)
Supplement: s1 [file s1]

# SURVEY OF PUBLIC OPINION REGARDING THE LOCATION OF TEMPORARY ACCOMMODATION PLACES DURING CRISIS SITUATIONS IN CITIES

*The survey is conducted within the framework of a joint international research conducted by the Department of Urban Planning, Institute of Architecture and Design, Lviv Polytechnic National University (Ukraine) and the Department of Spatial Management and Environmental Science, Faculty of Geodesy and Cartography, Warsaw University of Technology (Poland)*

**1. Your age:**

|                |             |             |             |              |
|----------------|-------------|-------------|-------------|--------------|
| Up to 16 years | 17-24 years | 25-35 years | 36-59 years | More than 60 |
|----------------|-------------|-------------|-------------|--------------|

**2. Your gender:**

|   |   |
|---|---|
| w | m |
|---|---|

**3. Your marital status:**

|        |                           |                              |                            |                               |
|--------|---------------------------|------------------------------|----------------------------|-------------------------------|
| Single | Married and have children | Married and have no children | Divorced and have children | Divorced and have no children |
|--------|---------------------------|------------------------------|----------------------------|-------------------------------|

**4. Family integrity:**

|                                 |                                                                                             |                                                                       |
|---------------------------------|---------------------------------------------------------------------------------------------|-----------------------------------------------------------------------|
| The whole family lives together | The family is temporarily separated (husband / wife / child at the front / in another city) | You have lost a family member (husband / wife / child) due to the war |
|---------------------------------|---------------------------------------------------------------------------------------------|-----------------------------------------------------------------------|

**5. Are you an internally displaced person?**

|     |    |
|-----|----|
| yes | no |
|-----|----|

**6. Are you employed officially / unofficially?**

|     |    |                   |                    |         |
|-----|----|-------------------|--------------------|---------|
| yes | no | Looking for a job | On maternity leave | Retired |
|-----|----|-------------------|--------------------|---------|

**7. Where do you live now?**

|                   |                                             |                                 |                          |                                          |
|-------------------|---------------------------------------------|---------------------------------|--------------------------|------------------------------------------|
| In a modular camp | In a temporary shelter (gym / school, etc.) | In a hotel / hostel / dormitory | Rent an apartment / room | With friends / acquaintances / relatives |
|-------------------|---------------------------------------------|---------------------------------|--------------------------|------------------------------------------|

**8. How long have you lived here?**

|                               |            |                  |               |
|-------------------------------|------------|------------------|---------------|
| From the beginning of the war | 1-2 months | 1 week - 1 month | Just moved in |
|-------------------------------|------------|------------------|---------------|

**9. How much longer do you plan (would like) to live here?**

|                       |                                           |                                      |                                             |             |                                 |
|-----------------------|-------------------------------------------|--------------------------------------|---------------------------------------------|-------------|---------------------------------|
| Until the war is over | Until I rebuild / repair my previous home | Until the state gives me new housing | Until I can buy / rent a new home by myself | permanently | It's hard to say / I don't know |
|-----------------------|-------------------------------------------|--------------------------------------|---------------------------------------------|-------------|---------------------------------|

**10. Are you generally satisfied with the place and living conditions?**

|     |    |        |
|-----|----|--------|
| yes | no | partly |
|-----|----|--------|

**11. What do you like about your current place of residence?**

*Name one or more positive characteristics, if any.....*

**12. What do you dislike about your current place of residence?**

*Name one or more negative characteristics, if any.....*

**13. What should be within walking distance (up to 20 minutes on foot) to your place of residence?**

Evaluate the priority of the objects listed below on a 10-point scale, where 10 - it must be near the place of residence, 5 - it is desirable to be close to the place of residence; 0 - does not need to be near the place of residence.

|                                                                                                                          |  |
|--------------------------------------------------------------------------------------------------------------------------|--|
| Medical institutions (clinics, hospitals, rehabilitation centers, etc.)                                                  |  |
| Catering establishments (cafes, restaurants, canteens, cafes, etc.)                                                      |  |
| Public transport stops                                                                                                   |  |
| Centers of administrative services (City district administrations, etc.)                                                 |  |
| Trade establishments (shops, shopping malls, supermarkets, markets, etc.)                                                |  |
| Recreation areas (parks, green areas, playgrounds, etc.)                                                                 |  |
| Educational institutions (schools, kindergartens, etc.)                                                                  |  |
| Institutions of culture and entertainment (cinemas, theaters, concert halls, etc.)                                       |  |
| Sports facilities (sports complexes, sports grounds, stadiums, etc.)                                                     |  |
| Religious institutions (churches, chapels, religious schools, etc.)                                                      |  |
| Shelters (bomb shelters, underground car parks, other shelters in case of air alarm)                                     |  |
| Humanitarian and volunteer centers (places for collecting and issuing humanitarian aid, psychological aid offices, etc.) |  |

Your option

Enter other city infrastructure that must be nearby but not listed here:

|  |
|--|
|  |
|--|

**14. What should be within transport accessibility (up to 1 hour by public transport) to your place of residence?**

Evaluate the priority of the objects listed below on a 10-point scale, where 10 - it must be within transport accessibility of the place of residence, 5 - it is desirable that it be within transport accessibility with the place of residence; 0 - does not need to be within transport accessibility of the place of residence.

|                                                                                                                          |  |
|--------------------------------------------------------------------------------------------------------------------------|--|
| Medical institutions (clinics, hospitals, rehabilitation centers, etc.)                                                  |  |
| Catering establishments (cafes, restaurants, canteens, cafes, etc.)                                                      |  |
| Public transport stops                                                                                                   |  |
| Centers of administrative services (City district administrations, etc.)                                                 |  |
| Trade establishments (shops, shopping malls, supermarkets, markets, etc.)                                                |  |
| Recreation areas (parks, green areas, playgrounds, etc.)                                                                 |  |
| Educational institutions (schools, kindergartens, etc.)                                                                  |  |
| Institutions of culture and entertainment (cinemas, theaters, concert halls, etc.)                                       |  |
| Sports facilities (sports complexes, sports grounds, stadiums, etc.)                                                     |  |
| Religious institutions (churches, chapels, religious schools, etc.)                                                      |  |
| Shelters (bomb shelters, underground car parks, other shelters in case of air alarm)                                     |  |
| Humanitarian and volunteer centers (places for collecting and issuing humanitarian aid, psychological aid offices, etc.) |  |

Your option

Enter other city infrastructure, which must be within transport accessibility, but not listed here:

|  |
|--|
|  |
|--|

**15. What should not be near (up to 20 minutes on foot) your place of residence?**

Evaluate the priority of the objects listed below on a 10-point scale, where 10 - it can in no case be near the place of residence, 5 - it is desirable that it was not near the place of residence; 0 - may be near the place of residence.

|                                                                                                   |  |
|---------------------------------------------------------------------------------------------------|--|
| Transport facilities (railway station, bus station, airport, etc.)                                |  |
| Burial places and memorial complexes (cemeteries, crematoria, memorials to fallen soldiers, etc.) |  |
| Parking lots, garages, multilevel parking lots                                                    |  |
| Industrial areas (non-harmful enterprises, etc.)                                                  |  |
| Animal shelters, veterinary clinics, dog walking areas                                            |  |
| Military facilities                                                                               |  |
| Engineering communications facilities (gas distribution point, power lines, boiler rooms, etc.)   |  |
| Warehouses, logistics centers                                                                     |  |

Your option

Enter other city infrastructure that should not be nearby, but are not listed here:

|  |
|--|
|  |
|--|

**16. Additional comments (optional field):**

|  |
|--|
|  |
|--|

**THANK YOU FOR YOUR ANSWERS!**
